# Supplementary material for: Hierarchical multi-scale simulations of adhesion at polymer–metal interfaces: dry and wet conditions
Source: Royal Society of Chemistry journal article supplement (doi:10.1039/c5cp00343a), 2015-01-01
Supplement: c5cp00343a1.pdf [file c5cp00343a1.pdf]

## SUPPORTING INFORMATION

for

### *Hierarchical multi-scale simulations of adhesion at polymer-metal interfaces: Dry and wet conditions*

by

*Gokhan Kacar<sup>a,\*</sup>, Elias A.J.F. Peters<sup>a</sup>, Leendert G.J. van der Ven<sup>a,b</sup>, Gijsbertus de With<sup>a,\*</sup>*

<sup>a</sup> Laboratory of Materials and Interface Chemistry, Department of Chemical Engineering and Chemistry, Eindhoven University of Technology, Eindhoven, The Netherlands.

<sup>b</sup> AkzoNobel Automotive & Aerospace Coatings, Sassenheim, The Netherlands.

\* E-mail: g.dewith@tue.nl, Tel.: +31-40-247-4947

\* E-mail: g.kacar@tue.nl, Tel.: +31-40-247-8064

### Table of Contents:

|                                                                                                                                                                                                                       |    |
|-----------------------------------------------------------------------------------------------------------------------------------------------------------------------------------------------------------------------|----|
| <b>Table S1.</b> The non-bonded DPD interaction parameters used in simulations. Dashes indicate no interaction computed between the aromatic (bead B) and aliphatic (bead L) rings while W indicates the water beads. | S3 |
| <b>Table S2.</b> Liquid mass densities ( $\rho_{m,i}$ ), molecular weights ( $M_W$ ), pure component number densities ( $\rho_{i,\text{pure}}$ ), and solubility parameters ( $\delta_i$ ).                           | S4 |
| <b>Table S3.</b> Bond potential parameters of the equation $V_{B,ij}(r) = k_{ij}(r - r_{0,ij})^2$ used in the simulations.                                                                                            | S4 |
| <b>Table S4.</b> Angle potential parameters of the equation $V_{A,ijk}(\theta) = k_{ijk}(\theta - \theta_{0,ijk})^2$ used in the simulations.                                                                         | S5 |

The input parameters for the DPD simulations, such as the number density of beads  $\rho_{i,pure}$  in a liquid made up only of beads of type  $i$ , the solubility parameters  $\delta$  and the pair-wise interactions  $a_{ij}$  are presented in this Supporting Information. We obtained the solubility parameter  $\delta$  for each bead type by taking molar group contributions into consideration as given for the van Krevelen-Hoftyzer approach <sup>1</sup>, calculated by the Molecular Modeling Pro software <sup>2</sup>.

**Table S1.** The non-bonded DPD interaction parameters used in simulations. Dashes indicate no interaction computed between the aromatic (bead B) and aliphatic (bead L) rings while W indicates the water beads.

| $a_{ij}/k_B T$ | A     | B    | L    | C     | D     | J     | A'    | D'    | D''   | W     | Al   |
|----------------|-------|------|------|-------|-------|-------|-------|-------|-------|-------|------|
| A              | 27.8  | 49.8 | 50.1 | 33.2  | 23.3  | 33.9  | 28.6  | 20.2  | 32.8  | 166.9 | 6.2  |
| B              | 49.8  | 62.0 | –    | 63.0  | 19.3  | 64.3  | 39.2  | 36.0  | 59.8  | 61.3  | 13.2 |
| L              | 50.1  | –    | 88.5 | 59.4  | 25.9  | 60.5  | 45.5  | 35.5  | 59.4  | 92.2  | 35.2 |
| C              | 33.2  | 63.0 | 59.4 | 35.5  | 36.3  | 35.9  | 38.4  | 26.7  | 37.0  | 195.3 | 82.1 |
| D              | 23.3  | 19.3 | 25.9 | 36.3  | 5.8   | 37.4  | 12.8  | 17.4  | 29.6  | 158.7 | 8.7  |
| J              | 33.9  | 64.3 | 60.5 | 35.9  | 37.4  | 36.4  | 39.4  | 27.4  | 37.6  | 196.5 | 23.0 |
| A'             | 28.6  | 39.2 | 45.5 | 38.4  | 12.8  | 39.4  | 22.7  | 19.8  | 35.3  | 122.7 | 7.0  |
| D'             | 20.2  | 36.0 | 35.5 | 26.7  | 17.4  | 27.4  | 19.8  | 14.2  | 24.8  | 192.9 | 9.2  |
| D''            | 32.8  | 59.8 | 59.4 | 37.0  | 29.6  | 37.6  | 35.3  | 24.8  | 37.7  | 168.5 | 85.0 |
| W              | 166.9 | 61.3 | 92.2 | 195.3 | 158.7 | 196.5 | 122.7 | 192.9 | 168.5 | 1.8   | 4.1  |
| Al             | 6.2   | 13.2 | 35.2 | 82.1  | 8.7   | 23.0  | 7.0   | 9.2   | 85.0  | 4.1   | 0.0  |

**Table S2.** Liquid mass densities ( $\rho_{m,i}$ ), molecular weights ( $M_W$ ), pure component number densities ( $\rho_{i,\text{pure}}$ ), and solubility parameters ( $\delta_i$ ).

| Type of Bead | $\rho_{m,i}$<br>(g/cm <sup>3</sup> ) | $M_W$<br>(g/mol) | $\rho_{i,\text{pure}} = \rho_{m,i}/M_W$<br>(Å <sup>-3</sup> ) | $\delta_i$<br>((J/cm <sup>3</sup> ) <sup>0.5</sup> ) |
|--------------|--------------------------------------|------------------|---------------------------------------------------------------|------------------------------------------------------|
| A            | 0.938                                | 58.07            | 0.0097                                                        | 20.02                                                |
| B            | 1.034                                | 94.11            | 0.0066                                                        | 29.08                                                |
| C            | 0.634                                | 44.09            | 0.0087                                                        | 16.11                                                |
| L            | 0.926                                | 100.16           | 0.0056                                                        | 22.41                                                |
| D            | 1.034                                | 31.05            | 0.0200                                                        | 27.74                                                |
| J            | 0.654                                | 46.07            | 0.0085                                                        | 15.83                                                |
| A'           | 0.821                                | 46.07            | 0.0107                                                        | 25.09                                                |
| D'           | 1.001                                | 45.08            | 0.0133                                                        | 21.64                                                |
| D''          | 0.825                                | 59.11            | 0.0084                                                        | 18.07                                                |
| W            | 1.000                                | 18.00            | 0.0334                                                        | 47.70                                                |

**Table S3.** Bond potential parameters of the equation  $V_{B,ij}(r) = k_{ij}(r - r_{0,ij})^2$  used in the simulations.

| Bond type | $k_{ij}$ [kT/<br>$r_{DPD}^2$ ] | $r_{0,ij}$<br>[ $r_{DPD}$ ] | Bond<br>type | $k_{ij}$ [kT/<br>$r_{DPD}^2$ ] | $r_{0,ij}$<br>[ $r_{DPD}$ ] |
|-----------|--------------------------------|-----------------------------|--------------|--------------------------------|-----------------------------|
| A-B       | 500.0                          | 0.65                        | A'-D'        | 500.0                          | 0.44                        |
| A-L       | 500.0                          | 0.70                        | A'-D''       | 500.0                          | 0.44                        |
| B-C       | 500.0                          | 0.54                        | A'-B         | 500.0                          | 0.65                        |
| L-C       | 500.0                          | 0.56                        | A'-L         | 500.0                          | 0.70                        |
| D-J       | 500.0                          | 0.45                        | D'-J         | 500.0                          | 0.45                        |
| A'-D      | 500.0                          | 0.44                        | D''-J        | 500.0                          | 0.45                        |

**Table S4.** Angle potential parameters of the equation  $V_{A,ijk}(\theta) = k_{ijk}(\theta - \theta_{0,ijk})^2$  used in the simulations.

| Angle type | $k_{ijk}$<br>[ $kT/\text{rad}^2$ ] | $\theta_{0,ijk}$<br>[deg] |
|------------|------------------------------------|---------------------------|
| A-B-C      | 50.0                               | 170.6                     |
| B-C-B      | 50.0                               | 94.7                      |
| D-J-J      | 50.0                               | 106.7                     |
| A-L-C      | 50.0                               | 94.6                      |
| L-C-L      | 50.0                               | 75.5                      |
| A'-B-C     | 50.0                               | 170.6                     |
| D'-J-J     | 50.0                               | 106.7                     |
| A'-L-C     | 50.0                               | 94.6                      |
| D''-J-J    | 50.0                               | 106.7                     |

## References

1. D. W. van Krevelen, *Properties of Polymers*, Elsevier, Amsterdam, 1990.
2. *Molecular Modeling Pro*, (1992) Norgwyn Montgomery Software Inc.
